# Supplementary material for: Ultrasensitive Detection of Multidrug-Resistant Mycobacterium tuberculosis Using SuperSelective Primer-Based Real-Time PCR Assays
Source: MDPI journal article supplement (doi:10.3390/ijms232415752), 2022-12-12
Supplement: s1 [file s1]

# Ultrasensitive Detection of Multidrug-Resistant *Mycobacterium tuberculosis* Using SuperSelective Primer-Based Real-Time PCR Assays

Anshika Narang <sup>1</sup>, Salvatore A. E. Marras <sup>1,\*</sup>, Natalia Kurepina <sup>2</sup>, Varsha Chauhan <sup>3</sup>, Elena Shashkina <sup>2</sup>, Barry Kreiswirth <sup>2</sup>, Mandira Varma-Basil <sup>3</sup>, Christopher Vinnard <sup>4</sup> and Selvakumar Subbian <sup>1,\*</sup>

<sup>1</sup> Public Health Research Institute, New Jersey Medical School, Rutgers University, Newark, NJ 07103, USA

<sup>2</sup> Center for Discovery and Innovation, Nutley, NJ 07110, USA

<sup>3</sup> Department of Microbiology, Vallabhbhai Patel Chest Institute, University of Delhi, Delhi 110021, India

<sup>4</sup> New Jersey Medical School, Rutgers University, Newark, NJ 07103, USA

\* Correspondence: marrassa@njms.rutgers.edu (S.A.E.M.); subbiase@njms.rutgers.edu (S.S.)

**Citation:** Narang, A.; Marras, S.A.E.; Kurepina, N.; Chauhan, V.; Shashkina, E.; Kreiswirth, B.; Varma-Basil, M.; Vinnard, C.; Subbian, S. Ultrasensitive Detection of Multidrug-Resistant *Mycobacterium tuberculosis* Using SuperSelective Primer-Based Real-Time PCR Assays. *Int. J. Mol. Sci.* **2022**, *23*, 15752. <https://doi.org/10.3390/ijms232415752>

Received: 19 October 2022

Accepted: 9 December 2022

Published: 12 December 2022

**Publisher's Note:** MDPI stays neutral with regard to jurisdictional claims in published maps and institutional affiliations.

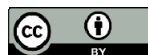

**Copyright:** © 2022 by the authors. Submitted for possible open access publication under the terms and conditions of the Creative Commons Attribution (CC BY) license (<https://creativecommons.org/licenses/by/4.0/>).

a)

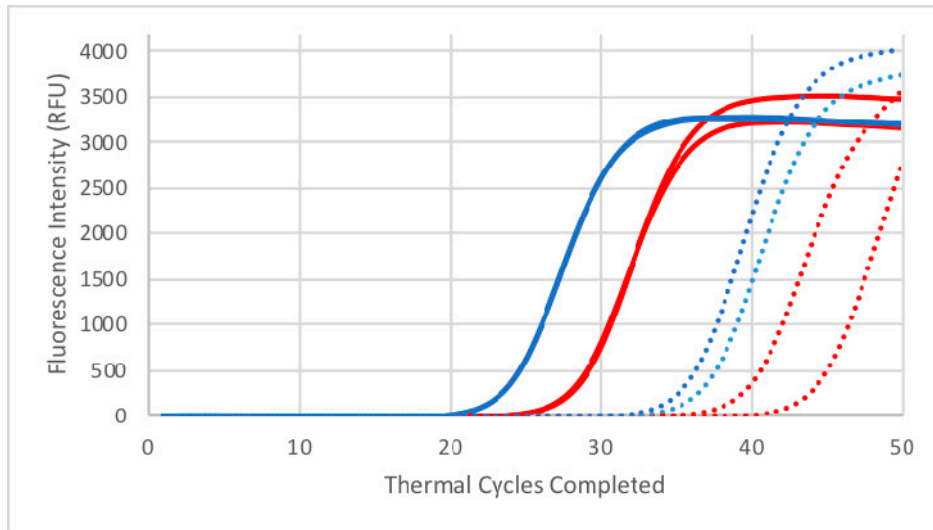

b)

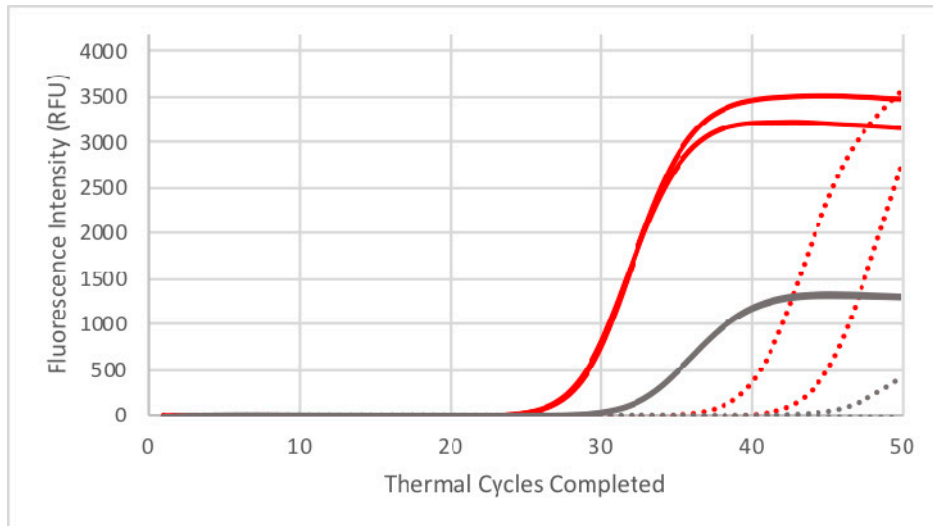

**Figure S1.** Effect of increase in length of the foot and intervening sequence of a SuperSelective primer on its performance. The plot shows the results of PCR assays for the detection of *inhA* promoter -15 mutation using  $10^5$  copies of mutant pDNA (solid lines) and  $10^5$  copies of WT pDNA (dotted lines). a. Comparison of threshold cycles with SuperSelective primer inh15\_SSP3 (18-14/14-6:1:0) (red) and inh15\_SSP4 (18-14/13-7:1:0) (blue) with foot length 7bp and 8bp respectively. b. Comparison of threshold cycles with SuperSelective primer inh15\_SSP3 (18-14/14-6:1:0) (red) and inh15\_SSP2 (18-14/21-6:1:0) (grey) with intervening sequence length 14bp and 21bp respectively.

a)

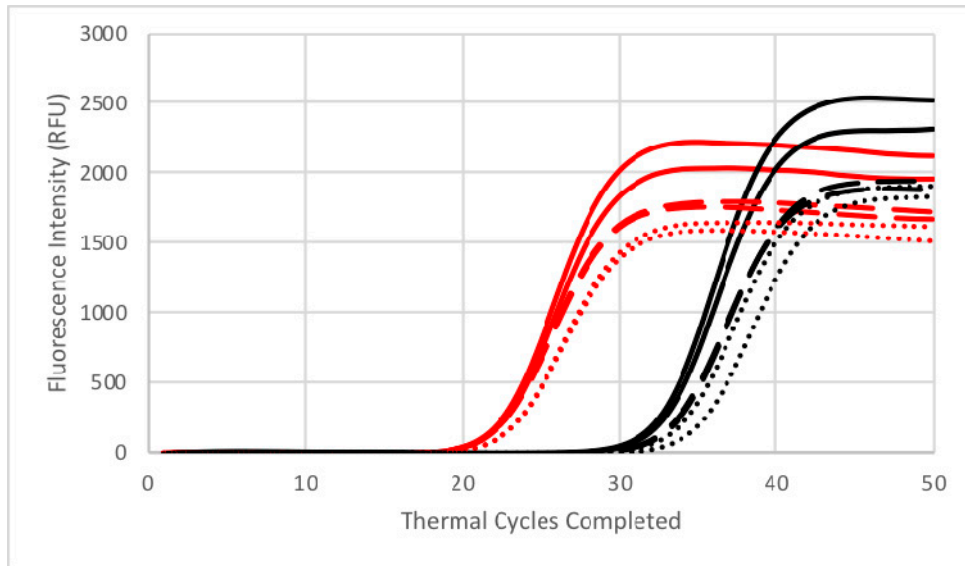

b)

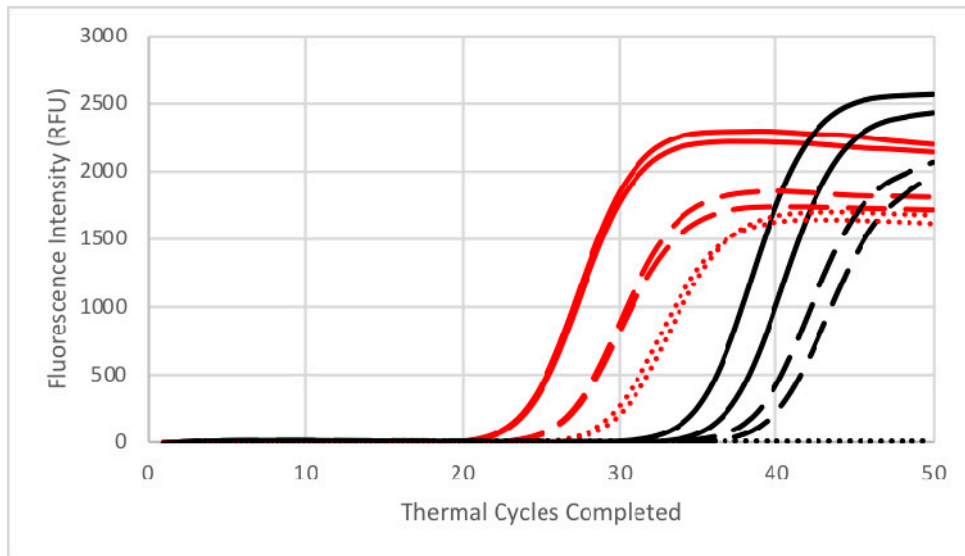

**Figure S2.** Efficiency of SuperSelective primer designs with symmetric and asymmetric bubble under different annealing temperatures. a. inh15\_SSP8 (18-8/8-7:1:0) – symmetric bubble, b. inh15\_SSP7 (18-20/8-7:1:0) – asymmetric bubble. The plots show the results of PCR assays carried out for the detection of *inhA* promoter -15 mutation using  $10^5$  copies of mutant pDNA (red) and  $10^5$  copies of WT pDNA (black) at an annealing temperature of 60°C (Solid lines), 64°C (Broken lines), and 66°C (Dotted lines).

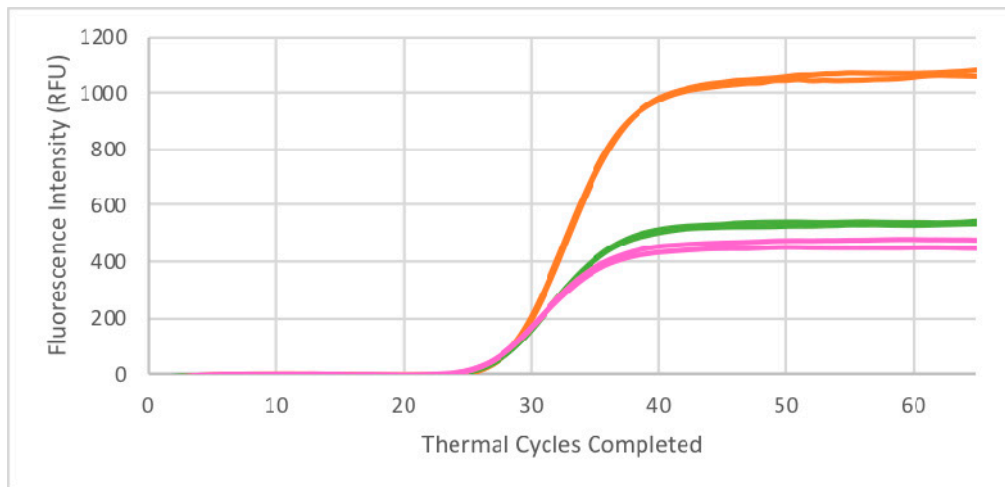

**Figure S3.** Fluorescence signal intensity of *inhA* probe at different molecular beacon concentrations. The plot shows amplification of  $10^5$  copies of mutant target DNA template using SuperSelective primer inh8\_SSP1 (18-14/14-6:1:0) and a conventional reverse primer for the detection of *inhA* promoter mutation -8T-->A at molecular beacon probe concentrations 0.25 μM (orange), 0.125 μM (green) and 0.1 μM (pink). There was no significant difference between the signal intensity with 0.1 μM and 0.125 μM probe; however, 0.25 μM probe resulted in signals with the highest fluorescence intensity.

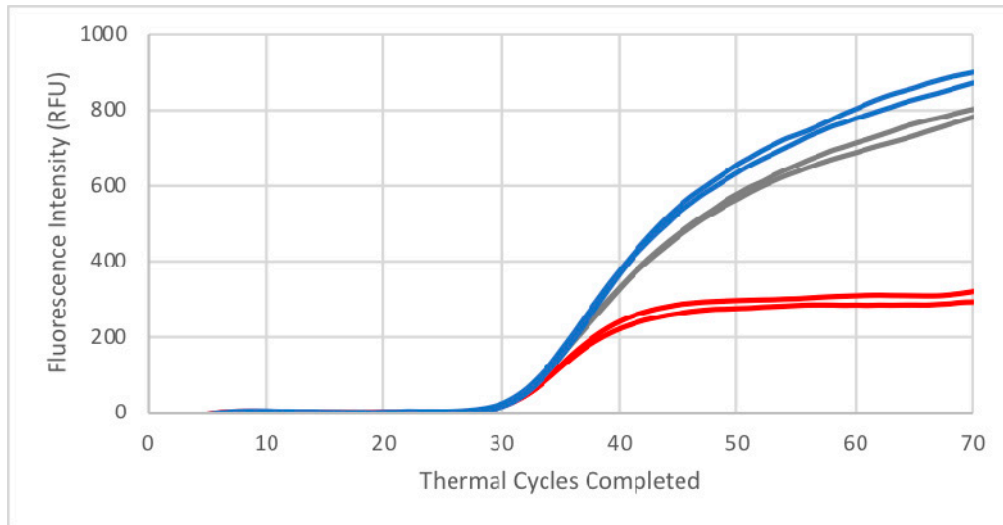

**Figure S4.** Fluorescence signal intensity of *rpoB* probe in asymmetric PCR. The plot shows the amplification of  $10^5$  copies of *rpoB* D516V GAC-->GTC mutant template with SuperSelective primer *rpoB*516\_SSP4 (18-14/13-7:1:0) and a conventional reverse primer in the ratio 1:1, 1:5 and 1:10. Asymmetric PCR with forward primer 0.1 $\mu$ M, reverse primer 0.5 $\mu$ M (grey) and 1 $\mu$ M (blue) resulted in higher fluorescence intensity as compared to symmetric PCR with forward and reverse primer 0.1 $\mu$ M (red). However, there was no significant difference in fluorescence intensity with reverse primer 0.5 $\mu$ M and 1 $\mu$ M.

**Table S1:** RT-PCR assay conditions tested for the optimization of SuperSelective primers for the detection of *inhA* promoter mutation -15C→T.

| Forward Primer              | Reverse Primer         | Annealing Temperature (°C) | TMAC (mM)* |
|-----------------------------|------------------------|----------------------------|------------|
| inh15_SSP2 (18-14/21-6:1:0) | inhA_rev1              | 60                         | 25         |
| inh15_SSP3 (18-14/14-6:1:0) | inhA_rev1              | 60, 62                     | 25         |
| inh15_SSP3 (18-14/14-6:1:0) | inhA_rev2              | 60                         | 25         |
| inh15_SSP4 (18-14/13-7:1:0) | inhA_rev1              | 60, 62, 66                 | 25         |
| inh15_SSP4 (18-14/13-7:1:0) | inhA_rev3, inhA_rev4   | 60                         | 25         |
| inh15_SSP5 (18-15/13-7:1:0) | inhA_rev1              | 60, 62                     | 25         |
| inh15_SSP6 (18-17/13-7:1:0) |                        |                            |            |
| inh15_SSP7 (18-20/8-7:1:0)  | inhA_rev1              | 60, 64, 66                 | 25         |
| inh15_SSP8 (18-8/8-7:1:0)   |                        |                            |            |
| inh15_SSP9 (18-8/20-7:1:0)  |                        |                            |            |
| inhA_for2                   | SSP10 (18-14/14-6:1:0) | 60                         | 25         |
| inh15_SSP4 (18-14/13-7:1:0) |                        |                            |            |
| inh15_SSP4 (18-14/13-7:1:0) | SSP10 (18-14/14-6:1:0) | 60, 64                     | 0, 25      |
| inh15_SSP7 (18-20/8-7:1:0)  |                        |                            |            |
| inhA_for2                   | SSP11 (18-14/13-7:1:0) | 60                         | 0, 25      |
| inhA_for4                   |                        |                            |            |
| inh15_SSP4 (18-14/13-7:1:0) |                        |                            |            |
| inh15_SSP7 (18-20/8-7:1:0)  |                        |                            |            |
| inhA_for2                   | SSP12 (18-14/8-6:1:0)  | 60                         | 0          |
| inhA_for4                   | SSP13 (18-14/8-7:1:0)  |                            |            |
| inh15_SSP4 (18-14/13-7:1:0) |                        |                            |            |
| inh15_SSP7 (18-20/8-7:1:0)  |                        |                            |            |
| inh15_SSP4 (18-14/13-7:1:0) | SSP10 (18-14/14-6:1:0) | 64, 66                     | 0          |
| inh15_SSP7 (18-20/8-7:1:0)  | SSP11 (18-14/13-7:1:0) |                            |            |
|                             | SSP12 (18-14/8-6:1:0)  |                            |            |
|                             | SSP13 (18-14/8-7:1:0)  |                            |            |
| inh15_SSP4 (18-14/13-7:1:0) | SSP17,18               | 60                         | 25         |
| inh15_SSP22                 | SSP10 (18-14/14-6:1:0) | 60                         | 0          |
| inh15_SSP14-16, 19-21       | inhA_rev1              | 60                         | 25         |
| inh15_SSP23-25              | SSP10 (18-14/14-6:1:0) | 60                         | 25         |
| inh15_SSP3 (18-14/14-6:1:0) | inhA_rev1              | 60                         | 0          |
| inh15_SSP4 (18-14/13-7:1:0) |                        |                            |            |
| inh15_SSP7 (18-20/8-7:1:0)  |                        |                            |            |

\*Addition of TMAC was always accompanied by Tween 20 (0.25%)

**Table S2:** List of primers used for *katG*, *inhA* and *rpoB* mutations.

| Gene        | Mutation           | Primer ID      | Strand<br>d<br>+/- | Design         | Sequence                                                                    |
|-------------|--------------------|----------------|--------------------|----------------|-----------------------------------------------------------------------------|
| <i>katG</i> | S315T<br>AGC-->ACA | katG315T2_SSP1 | +                  | 20-14/14-5:2:0 | <u>GCTCGTATGGCACCGGAACCAC</u><br><u>ACTACCGCGACCCACCACA</u>                 |
| <i>katG</i> | S315T<br>AGC-->ACC | katG315T1_SSP1 | +                  | 20-14/14-5:1:0 | <u>GCTCGTATGGCACCGGAACCAC</u><br><u>ACTACCGCGACCCACCAC</u>                  |
| <i>katG</i> | S315T<br>AGC-->ACC | katG315T1_SSP2 | +                  | 20-14/13-6:1:0 | <u>GCTCGTATGGCACCGGAACCTC</u><br><u>ACTACAGAAACCTCACCAC</u>                 |
| <i>katG</i> |                    | katG_rev1      | -                  |                | ATTTCGTCGGGGTGTTTCGTC                                                       |
| <i>katG</i> |                    | katG_rev2      | -                  |                | TCGTAGCCGTACAGGATCTCG                                                       |
| <i>inhA</i> | -8T-->A            | inh8_SSP1      | -                  | 18-14/14-6:1:0 | <u>GTTTGGCCCCCTTCAGTGGAAATA</u><br><u>TTGTTGATAACCGACAT</u>                 |
| <i>inhA</i> | -8T-->A            | inh8_SSP2      | -                  | 20-14/14-6:1:0 | <u>GGGTTTGGCCCCCTTCAGTGGAA</u><br><u>TATTGTTGATAACCGACAT</u>                |
| <i>inhA</i> | -15C-->T           | inh15_SSP2     | -                  | 18-14/21-6:1:0 | <u>GTTTGGCCCCCTTCAGTGGAAATA</u><br><u>TTGTCATGTTCCCTATCA</u>                |
| <i>inhA</i> | -15C-->T           | inh15_SSP3     | -                  | 18-14/14-6:1:0 | <u>CCCTTCAGTGGCTGTGGCTATA</u><br><u>TTGTCATGTTCCCTATCA</u>                  |
| <i>inhA</i> | -15C-->T           | inh15_SSP4     | -                  | 18-14/13-7:1:0 | <u>CCCTTCAGTGGCTGTGGCTATA</u><br><u>TTGTCATGTTACCTATCA</u>                  |
| <i>inhA</i> | -15C-->T           | inh15_SSP5     | -                  | 18-15/13-7:1:0 | <u>CCCTTCAGTGGCTGTGGCTATA</u><br><u>TTAGTCATGTTACCTATCA</u>                 |
| <i>inhA</i> | -15C-->T           | inh15_SSP6     | -                  | 18-17/13-7:1:0 | <u>CCCTTCAGTGGCTGTGGCTATA</u><br><u>TTATCGTCATGTTACCTATCA</u>               |
| <i>inhA</i> | -15C-->T           | inh15_SSP7     | -                  | 18-20/8-7:1:0  | <u>CAGTGGCTGTGGCAGTCATCTA</u><br><u>GTACACTCGTCATGTTACCTATC</u><br><u>A</u> |
| <i>inhA</i> | -15C-->T           | inh15_SSP8     | -                  | 18-8/8-7:1:0   | <u>CAGTGGCTGTGGCAGTCAGTCA</u><br><u>TGTTACCTATCA</u>                        |
| <i>inhA</i> | -15C-->T           | inh15_SSP9     | -                  | 18-8/20-7:1:0  | <u>GTTTGGCCCCCTTCAGTGGATCAT</u><br><u>GTTACCTATCA</u>                       |
| <i>inhA</i> | -15C-->T           | inh15_SSP10    | +                  | 18-14/14-6:1:0 | <u>CTCGTGGACATACCGATTGTTG</u><br><u>TTCATCAGTAGCGAGAT</u>                   |
| <i>inhA</i> | -15C-->T           | inh15_SSP11    | +                  | 18-14/13-7:1:0 | <u>CTCGTGGACATACCGATTGTTG</u><br><u>TTCATCAGTGGCGAGAT</u>                   |
| <i>inhA</i> | -15C-->T           | inh15_SSP12    | +                  | 18-14/8-6:1:0  | <u>CTCGTGGACATACCGATTGTTG</u><br><u>TTCAGCGAGAT</u>                         |
| <i>inhA</i> | -15C-->T           | inh15_SSP13    | +                  | 18-14/8-7:1:0  | <u>CTCGTGGACATACCGATTGTTG</u>                                               |

|             |          |             |   |                |                                                                               |
|-------------|----------|-------------|---|----------------|-------------------------------------------------------------------------------|
|             |          |             |   |                | <b>TTCAGGCGAGAT</b>                                                           |
| <i>inhA</i> | -15C-->T | inh15_SSP14 | - | 18-14/14-6:1:0 | <u>CCCTTCAGTGGCTGTGGCTATA</u><br><b>TTGTCATGTTCTCTCA</b>                      |
| <i>inhA</i> | -15C-->T | inh15_SSP15 | - | 18-14/13-7:1:0 | <u>CCCTTCAGTGGCTGTGGCTATA</u><br><b>TTGTCATGTTACCTCTCA</b>                    |
| <i>inhA</i> | -15C-->T | inh15_SSP16 | - | 18-20/8-7:1:0  | <u>CAGTGGCTGTGGCAGTCATCTA</u><br><u>GTACACTCGTCATGTTACCTCTC</u><br><b>A</b>   |
| <i>inhA</i> | -15C-->T | inh15_SSP17 | + | 20-14/14-6:1:0 | <u>CGCTCGTGGACATACCGATTGT</u><br><b>TGTTTCATCAGTAGCGAGAT</b>                  |
| <i>inhA</i> | -15C-->T | inh15_SSP18 | + | 20-14/13-7:1:0 | <u>CGCTCGTGGACATACCGATTGT</u><br><b>TGTTTCATCAGTGGCGAGAT</b>                  |
| <i>inhA</i> | -15C-->T | inh15_SSP19 | - | 18-14/14-6:1:2 | <u>CCCTTCAGTGGCTGTGGCTATA</u><br><b>TTGTCATGTTCTATCATC</b>                    |
| <i>inhA</i> | -15C-->T | inh15_SSP20 | - | 18-14/13-7:1:2 | <u>CCCTTCAGTGGCTGTGGCTATA</u><br><b>TTGTCATGTTACCTATCATC</b>                  |
| <i>inhA</i> | -15C-->T | inh15_SSP21 | - | 18-20/8-7:1:2  | <u>CAGTGGCTGTGGCAGTCATCTA</u><br><u>GTACACTCGTCATGTTACCTATC</u><br><b>ATC</b> |
| <i>inhA</i> | -15C-->T | inh15_SSP22 | - | 18-14/14-3:1:2 | <u>TTCAGTGGCTGTGGCAGTATTG</u><br><b>TTACATTATAATCATC</b>                      |
| <i>inhA</i> | -15C-->T | inh15_SSP23 | - | 18-14/14-3:2:1 | <u>TTCAGTGGCTGTGGCAGTATTG</u><br><b>TTACATTATAATCACC</b>                      |
| <i>inhA</i> | -15C-->T | inh15_SSP24 | - | 18-14/14-6:2:1 | <u>CCCTTCAGTGGCTGTGGCTATA</u><br><b>TTGTCATGTTCTATCACC</b>                    |
| <i>inhA</i> | -15C-->T | inh15_SSP25 | - | 18-14/14-6:2:0 | <u>CCCTTCAGTGGCTGTGGCTATA</u><br><b>TTGTCATGTTCTATCAC</b>                     |
| <i>inhA</i> | -15C-->T | inh15_SSP26 | - | 18-10/14-6:1:0 | <u>CCCTTCAGTGGCTGTGGCTATA</u><br><b>TTGTCATGTTCTATCA</b>                      |
| <i>inhA</i> | -15C-->T | inh15_SSP27 | - | 20-14/13-7:1:0 | <u>GCCCCCTTCAGTGGCTGTGGCTA</u><br><b>TATTGTCATGTTACCTATCA</b>                 |
| <i>inhA</i> | -15C-->T | inh15_SSP28 | - | 18-14/12-8:1:0 | <u>CCCTTCAGTGGCTGTGGCTATA</u><br><b>TTGTCATGTTAACCTATCA</b>                   |
| <i>inhA</i> | -17G-->T | inh17_SSP1  | - | 18-14/15-6:1:0 | <u>CCTTCAGTGGCTGTGGCATATA</u><br><b>TTGTCATGTTTATCGTA</b>                     |
| <i>inhA</i> | -17G-->T | inh17_SSP2  | - | 18-14/14-6:1:0 | <u>CTTCAGTGGCTGTGGCAGTATA</u><br><b>TTGTCATGTTTATCGTA</b>                     |
| <i>inhA</i> | -17G-->T | inh17_SSP3  | - | 18-14/13-7:1:0 | <u>CTTCAGTGGCTGTGGCAGTATA</u><br><b>TTGTCATGTTCTATCGTA</b>                    |
| <i>inhA</i> | -17G-->T | inh17_SSP4  | - | 20-14/14-6:1:0 | <u>CCCTTCAGTGGCTGTGGCAGTA</u><br><b>TATTGTCATGTTTATCGTA</b>                   |



|             |                      |               |   |                |                                                              |
|-------------|----------------------|---------------|---|----------------|--------------------------------------------------------------|
| <i>inhA</i> | -17G-->T             | inh17_SSP5    | - | 20-14/13-7:1:0 | <u>CCCTTCAGTGGCTGTGGCAGTA</u><br><u>TATTGTCATGTTCTATCGTA</u> |
| <i>inhA</i> |                      | inhA_rev1     | + |                | GGAAATCGCAGCCACGTTAC                                         |
| <i>inhA</i> |                      | inhA_rev2     | + |                | TTACGCTCGTGGACATACCG                                         |
| <i>inhA</i> |                      | inhA_rev6     | + |                | CGTAACCCCACTGCGAAAGT                                         |
| <i>inhA</i> |                      | inhA_for2     | - |                | CTCGTGGACATACCGATT                                           |
| <i>inhA</i> |                      | inhA_for4     | - |                | CACGTTACGCTCGTGGACAT                                         |
| <i>rpoB</i> | D516V<br>(GAC-->GTC) | rpoB516_SSP1  | - | 20-14/14-6:1:0 | <u>TCGGCGCTTGTGGGTCAACCTG</u><br><u>CTTGTATACACATTCTGGA</u>  |
| <i>rpoB</i> | D516V<br>(GAC-->GTC) | rpoB516_SSP2  | - | 18-14/14-6:1:0 | <u>GGCGCTTGTGGGTCAACCTGCT</u><br><u>TGTATACACATTCTGGA</u>    |
| <i>rpoB</i> | D516V<br>(GAC-->GTC) | rpoB516_SSP3  | - | 20-14/13-7:1:0 | <u>TCGGCGCTTGTGGGTCAACCTG</u><br><u>CTTGTATACACAGTTCTGGA</u> |
| <i>rpoB</i> | D516V<br>(GAC-->GTC) | rpoB516_SSP4  | - | 18-14/13-7:1:0 | <u>GGCGCTTGTGGGTCAACCTGCT</u><br><u>TGTATACACAGTTCTGGA</u>   |
| <i>rpoB</i> | H526D<br>(CAC-->GAC) | rpoB526D_SSP1 | - | 20-14/14-6:1:0 | <u>GACAGACCGCCGGGCCCCAGT</u><br><u>ATTACAGTAAATTGCTTGTC</u>  |
| <i>rpoB</i> | H526D<br>(CAC-->GAC) | rpoB526D_SSP2 | - | 16-14/22-6:1:0 | <u>ACGTGACAGACCGCCGTATTAC</u><br><u>AGTAAATTGCTTGTC</u>      |
| <i>rpoB</i> | H526D<br>(CAC-->GAC) | rpoB526D_SSP3 | - | 16-14/21-7:1:0 | <u>ACGTGACAGACCGCCGTATTAC</u><br><u>AGTAAATTGCTTGTC</u>      |
| <i>rpoB</i> | H526D<br>(CAC-->GAC) | rpoB526D_SSP4 | - | 18-14/14-6:1:0 | <u>CAGACCGCCGGGCCCCAGTATT</u><br><u>ACAGTAAATTGCTTGTC</u>    |
| <i>rpoB</i> | H526D<br>(CAC-->GAC) | rpoB526D_SSP5 | - | 18-14/22-6:1:0 | <u>TCACGTGACAGACCGCCGTATT</u><br><u>ACAGTAAATTGCTTGTC</u>    |
| <i>rpoB</i> | H526D<br>(CAC-->GAC) | rpoB526D_SSP6 | - | 20-14/13-7:1:0 | <u>GACAGACCGCCGGGCCCCAGT</u><br><u>ATTACAGTAAATTGCTTGTC</u>  |
| <i>rpoB</i> | H526D<br>(CAC-->GAC) | rpoB526D_SSP7 | - | 18-14/13-7:1:0 | <u>CAGACCGCCGGGCCCCAGTATT</u><br><u>ACAGTAAATTGCTTGTC</u>    |
| <i>rpoB</i> | H526D<br>(CAC-->GAC) | rpoB526D_SSP8 | - | 18-14/21-7:1:0 | <u>TCACGTGACAGACCGCCGTATT</u><br><u>ACAGTAAATTGCTTGTC</u>    |
| <i>rpoB</i> | H526Y<br>(CAC-->TAC) | rpoB526Y_SSP1 | - | 20-14/14-6:1:0 | <u>GACAGACCGCCGGGCCCCAGT</u><br><u>ATTACAGTAAATTGCTTGTA</u>  |
| <i>rpoB</i> | H526Y<br>(CAC-->TAC) | rpoB526Y_SSP2 | - | 16-14/22-6:1:0 | <u>ACGTGACAGACCGCCGTATTAC</u><br><u>AGTAAATTGCTTGTA</u>      |
| <i>rpoB</i> | H526Y<br>(CAC-->TAC) | rpoB526Y_SSP3 | - | 16-14/21-7:1:0 | <u>ACGTGACAGACCGCCGTATTAC</u><br><u>AGTAAATTGCTTGTA</u>      |
| <i>rpoB</i> | H526Y<br>(CAC-->TAC) | rpoB526Y_SSP4 | - | 18-14/14-6:1:0 | <u>CAGACCGCCGGGCCCCAGTATT</u><br><u>ACAGTAAATTGCTTGTA</u>    |
| <i>rpoB</i> | H526Y                | rpoB526Y_SSP5 | - | 18-14/22-6:1:0 | <u>TCACGTGACAGACCGCCGTATT</u>                                |

|             |                      |               |   |                |                                                                     |
|-------------|----------------------|---------------|---|----------------|---------------------------------------------------------------------|
|             | (CAC-->TAC)          |               |   |                | <i>ACAGTAAATTGCTTGTA</i>                                            |
| <i>rpoB</i> | H526Y<br>(CAC-->TAC) | rpoB526Y_SSP6 | - | 20-14/13-7:1:0 | <u>GACAGACCGCCGGGCCCCAGT</u><br><i>ATTACAGTAAATT<b>CGCTTGTA</b></i> |
| <i>rpoB</i> | H526Y<br>(CAC-->TAC) | rpoB526Y_SSP7 | - | 18-14/13-7:1:0 | <u>CAGACCGCCGGGCCCCAGTATT</u><br><i>ACAGTAAATT<b>CGCTTGTA</b></i>   |
| <i>rpoB</i> | H526Y<br>(CAC-->TAC) | rpoB526Y_SSP8 | - | 18-14/21-7:1:0 | <u>TCACGTGACAGACCGCCGTATT</u><br><i>ACAGTAAATT<b>CGCTTGTA</b></i>   |
| <i>rpoB</i> | S531L<br>(TCG-->TTG) | rpoB531_SSP1  | - | 20-14/14-6:1:0 | <u>CCCGGCACGCTCACGTGACATG</u><br><i>TTATACTAAATT<b>AGCGCCA</b></i>  |
| <i>rpoB</i> | S531L<br>(TCG-->TTG) | rpoB531_SSP2  | - | 20-14/12-6:1:0 | <u>CGGCACGCTCACGTGACAGAT</u><br><i>GTTATACTAAATT<b>AGCGCCA</b></i>  |
| <i>rpoB</i> | S531L<br>(TCG-->TTG) | rpoB531_SSP3  | - | 18-14/14-6:1:0 | <u>CGGCACGCTCACGTGACATGTT</u><br><i>ATACTAAATT<b>AGCGCCA</b></i>    |
| <i>rpoB</i> | S531L<br>(TCG-->TTG) | rpoB531_SSP4  | - | 20-14/13-7:1:0 | <u>CCCGGCACGCTCACGTGACATG</u><br><i>TTATACTAAATT<b>CAGCGCCA</b></i> |
| <i>rpoB</i> | S531L<br>(TCG-->TTG) | rpoB531_SSP5  | - | 20-14/11-7:1:0 | <u>CGGCACGCTCACGTGACAGAT</u><br><i>GTTATACTAAATT<b>CAGCGCCA</b></i> |
| <i>rpoB</i> | S531L<br>(TCG-->TTG) | rpoB531_SSP6  | - | 18-14/13-7:1:0 | <u>CGGCACGCTCACGTGACATGTT</u><br><i>ATACTAAATT<b>CAGCGCCA</b></i>   |
| <i>rpoB</i> | S531L<br>(TCG-->TTG) | rpoB_rev1     | + |                | GAGGCGATCACACCGCAGAC                                                |
| <i>rpoB</i> | S531L<br>(TCG-->TTG) | rpoB_rev2     | + |                | GCCGCGATCAAGGAGTTCTTC                                               |
